# Supplementary material for: Anti-O-specific polysaccharide (OSP) immune responses following vaccination with oral cholera vaccine CVD 103-HgR correlate with protection against cholera after infection with wild-type Vibrio cholerae O1 El Tor Inaba in North American volunteers
Source: PubMed Central journal article supplement (PMC5906022; doi:10.1371/journal.pntd.0006376), 2018-04-06
Supplement: pntd.0006376.s001.pdf [file pntd.0006376.s001.pdf]

**S1 Table. Serum Inaba OSP-specific antibody isotype fold increase ( $\geq 1.5$ ) and Inaba-specific vibriocidal fold increase ( $\geq 4$ ) on day 10 following vaccination as a predictor of protection against development of moderate/severe cholera following subsequent challenge; by challenge day subgroup (day 10 and day 90).**

| Inaba OSP-specific antibody isotype fold increase; and Inaba vibriocidal fold increase | Fold increase on day 10 * | Moderate/ Severe diarrhea |    | P Value | Fold increase at day 10 in 10 day challenge group** | Moderate/ Severe diarrhea |    | P Value | Fold increase at day 10 in 90 day challenge group*** | Moderate/ Severe diarrhea |    | P Value |
|----------------------------------------------------------------------------------------|---------------------------|---------------------------|----|---------|-----------------------------------------------------|---------------------------|----|---------|------------------------------------------------------|---------------------------|----|---------|
|                                                                                        |                           | Yes                       | No |         |                                                     | Yes                       | No |         |                                                      | Yes                       | No |         |
| Any of 3 isotypes or all three IgM, A, and G $\geq 1.5$                                | Yes                       | 0                         | 27 | 0.01    | Yes                                                 | 0                         | 18 | 0.09    | Yes                                                  | 0                         | 9  | 0.22    |
|                                                                                        | No                        | 5                         | 14 |         | No                                                  | 2                         | 6  |         | No                                                   | 3                         | 8  |         |
| Either or both IgM, A $\geq 1.5$                                                       | Yes                       | 0                         | 27 | 0.01    | Yes                                                 | 0                         | 18 | 0.09    | Yes                                                  | 0                         | 9  | 0.22    |
|                                                                                        | No                        | 5                         | 14 |         | No                                                  | 2                         | 6  |         | No                                                   | 3                         | 8  |         |
| Either or both IgM, G $\geq 1.5$                                                       | Yes                       | 0                         | 26 | 0.01    | Yes                                                 | 0                         | 17 | 0.11    | Yes                                                  | 0                         | 9  | 0.22    |
|                                                                                        | No                        | 5                         | 15 |         | No                                                  | 2                         | 7  |         | No                                                   | 3                         | 8  |         |
| Either or both IgA, G $\geq 1.5$                                                       | Yes                       | 0                         | 19 | 0.07    | Yes                                                 | 0                         | 12 | 0.48    | Yes                                                  | 0                         | 7  | 0.52    |
|                                                                                        | No                        | 5                         | 22 |         | No                                                  | 2                         | 12 |         | No                                                   | 3                         | 10 |         |
| IgM $\geq 1.5$                                                                         | Yes                       | 0                         | 26 | 0.01    | Yes                                                 | 0                         | 17 | 0.11    | Yes                                                  | 0                         | 9  | 0.22    |
|                                                                                        | No                        | 5                         | 15 |         | No                                                  | 2                         | 7  |         | No                                                   | 3                         | 8  |         |
| IgA $\geq 1.5$                                                                         | Yes                       | 0                         | 19 | 0.07    | Yes                                                 | 0                         | 12 | 0.48    | Yes                                                  | 0                         | 7  | 0.52    |
|                                                                                        | No                        | 5                         | 22 |         | No                                                  | 2                         | 12 |         | No                                                   | 3                         | 10 |         |
| IgG $\geq 1.5$                                                                         | Yes                       | 0                         | 3  | 1.00    | Yes                                                 | 0                         | 2  | 1.00    | Yes                                                  | 0                         | 1  | 1.00    |

|                      |     |   |    |      |     |   |    |      |     |   |    |      |
|----------------------|-----|---|----|------|-----|---|----|------|-----|---|----|------|
|                      | No  | 5 | 38 |      | No  | 2 | 22 |      | No  | 3 | 16 |      |
| Vibriocidal<br>≥ 4.0 | Yes | 2 | 39 | 0.01 | Yes | 1 | 23 | 0.15 | Yes | 1 | 16 | 0.05 |
|                      | No  | 3 | 2  |      | No  | 1 | 1  |      | No  | 2 | 1  |      |

\*Represents increase on day 10 after vaccination from day 0 anti-OSP value; combining day 10 and day 90 challenge groups

\*\* Day 10 fold increase after vaccination over day 0 for day 10 challenge group only

\*\*\* Day 10 fold increase after vaccination over day 0 for day 90 challenge group only
