# Supplementary material for: Anti-O-specific polysaccharide (OSP) immune responses following vaccination with oral cholera vaccine CVD 103-HgR correlate with protection against cholera after infection with wild-type Vibrio cholerae O1 El Tor Inaba in North American volunteers
Source: PubMed Central journal article supplement (PMC5906022; doi:10.1371/journal.pntd.0006376), 2018-04-06
Supplement: pntd.0006376.s002.pdf [file pntd.0006376.s002.pdf]

**S2 Table. Serum Inaba OSP-specific antibody isotype fold increase ( $\geq 1.5$ ) and Inaba-specific vibriocidal fold increase ( $\geq 4$ ) on day 10 following vaccination as a predictor of protection against development of mild/moderate/severe cholera (any diarrhea) following subsequent challenge; by challenge day subgroup (day 10 and day 90).**

| Inaba OSP specific antibody isotype fold increase; and Inaba vibriocidal fold increase | Fold increase on day10 * | Mild/Moderate/Severe Cholera |    | P Value | Fold increase at day 10 in 10 day challenge group** | Mild/Moderate/Severe Cholera |    | P Value | Fold increase at day 10 in 90 day challenge group*** | Mild/Moderate/Severe Cholera |    | P Value |
|----------------------------------------------------------------------------------------|--------------------------|------------------------------|----|---------|-----------------------------------------------------|------------------------------|----|---------|------------------------------------------------------|------------------------------|----|---------|
|                                                                                        |                          | Yes                          | No |         |                                                     | Yes                          | No |         |                                                      | Yes                          | No |         |
| Any of 3 or all IgM, A, G $\geq 1.5$                                                   | Yes                      | 6                            | 21 | 0.03    | Yes                                                 | 2                            | 16 | 0.28    | Yes                                                  | 4                            | 5  | 0.36    |
|                                                                                        | No                       | 11                           | 8  |         | No                                                  | 3                            | 5  |         | No                                                   | 8                            | 3  |         |
| Either or both IgM, A $\geq 1.5$                                                       | Yes                      | 6                            | 21 | 0.03    | Yes                                                 | 2                            | 16 | 0.28    | Yes                                                  | 4                            | 5  | 0.36    |
|                                                                                        | No                       | 11                           | 8  |         | No                                                  | 3                            | 5  |         | No                                                   | 8                            | 3  |         |
| Either or both IgM, G $\geq 1.5$                                                       | Yes                      | 6                            | 20 | 0.04    | Yes                                                 | 2                            | 16 | 0.28    | Yes                                                  | 4                            | 5  | 0.36    |
|                                                                                        | No                       | 11                           | 9  |         | No                                                  | 3                            | 5  |         | No                                                   | 8                            | 3  |         |
| Either or both IgA, G $\geq 1.5$                                                       | Yes                      | 3                            | 16 | 0.02    | Yes                                                 | 1                            | 11 | 0.33    | Yes                                                  | 2                            | 5  | 0.06    |
|                                                                                        | No                       | 14                           | 13 |         | No                                                  | 4                            | 10 |         | No                                                   | 10                           | 3  |         |
| IgM $\geq 1.5$                                                                         | Yes                      | 6                            | 20 | 0.04    | Yes                                                 | 2                            | 15 | 0.28    | Yes                                                  | 4                            | 5  | 0.36    |
|                                                                                        | No                       | 11                           | 9  |         | No                                                  | 3                            | 6  |         | No                                                   | 8                            | 3  |         |
| IgA $\geq 1.5$                                                                         | Yes                      | 3                            | 16 | 0.02    | Yes                                                 | 1                            | 11 | 0.33    | Yes                                                  | 2                            | 5  | 0.06    |
|                                                                                        | No                       | 14                           | 13 |         | No                                                  | 4                            | 10 |         | No                                                   | 10                           | 3  |         |
| IgG $\geq 1.5$                                                                         | Yes                      | 0                            | 3  | 0.29    | Yes                                                 | 0                            | 2  | 1.00    | Yes                                                  | 0                            | 1  | 0.40    |
|                                                                                        | No                       | 17                           | 26 |         | No                                                  | 5                            | 19 |         | No                                                   | 12                           | 7  |         |
| Vibriocidal $\geq 4.0$                                                                 | Yes                      | 13                           | 28 | 0.06    | Yes                                                 | 4                            | 20 | 0.35    | Yes                                                  | 9                            | 8  | 0.24    |
|                                                                                        | No                       | 4                            | 1  |         | No                                                  | 1                            | 1  |         | No                                                   | 3                            | 0  |         |

\*Represents day 10 fold increase after vaccination from day 0 anti-OSP value; combining day 10 and day 90 challenge groups

\*\* Day 10 after vaccination fold increase over day 0 for day 10 challenge group only

\*\*\* Day 10 after vaccination fold increase over day 0 for day 90 challenge group only
