# Supplementary material for: Anti-O-specific polysaccharide (OSP) immune responses following vaccination with oral cholera vaccine CVD 103-HgR correlate with protection against cholera after infection with wild-type Vibrio cholerae O1 El Tor Inaba in North American volunteers
Source: PubMed Central journal article supplement (PMC5906022; doi:10.1371/journal.pntd.0006376), 2018-04-06

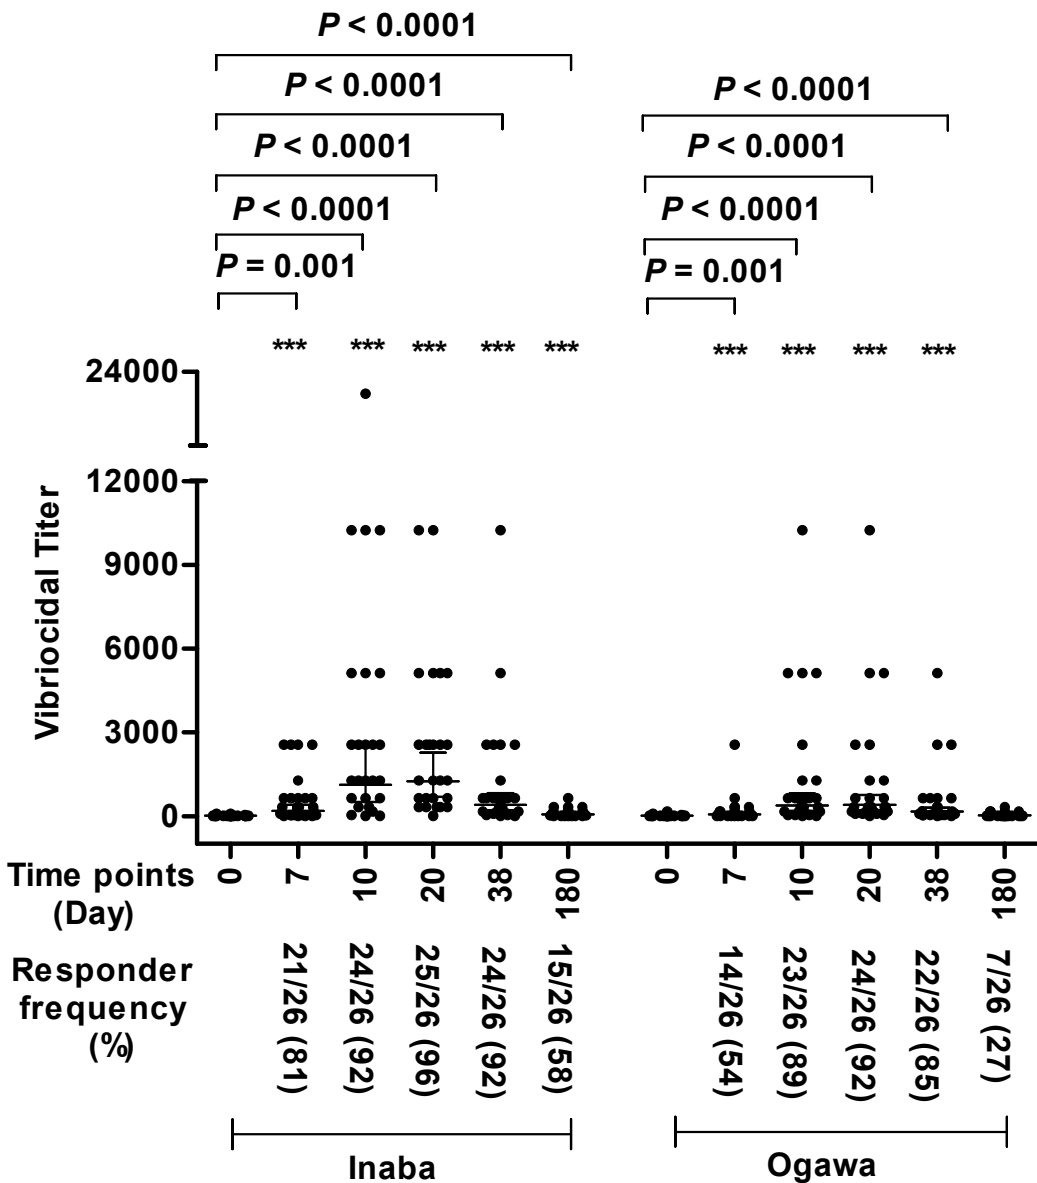

Supplement: pntd.0006376.s008.pdf [file pntd.0006376.s008.pdf]
